# Supplementary material for: Risk factors and clinical outcomes of Epstein–Barr virus DNAemia and post-transplant lymphoproliferative disorders after haploidentical and matched-sibling PBSCT in patients with hematologic malignancies
Source: Springer Nature journal article supplement (doi:10.1007/s00277-019-03742-7), 2019-06-26
Supplement: MOESM1 [file 16856314]

Supplementary Table 1 Transplant outcomes of the patients with hematological malignancies after HLA haploidentical and matched-sibling PBSCT

| Variable | Subgroup | | |  | Total  n = 200, % (95%CI) |
| --- | --- | --- | --- | --- | --- |
| MSD, n = 90, % (95%CI) | HID, n = 110, % (95%CI) | *p* value |
| Acute GVHD at 100 days after transplantation | 36.8 (26.9 - 46.8) | 60.0 (50.2 - 68.6) | 0.001 |  | 49.6 (42.4 - 56.3) |
| Grade 2 - 4 | 28.4 (19.2 - 38.3) | 36.5 (26.6 - 46.4) | 0.211 |  | 32.6 (25.8 - 39.6) |
| Grade 3 - 4 | 6.1 (2.3 - 12.8) | 5.9 (2.1 - 12.5) | 0.864 |  | 6.0 (3.1 - 10.4) |
| Chronic GVHD at 2 years after transplantation | 41.1 (30.1 - 51.7) | 24.4 (15.6 - 34.2) | 0.016 |  | 31.8 (24.8 - 38.9) |
| Severe chronic GVHD at 2 years after transplantation | 31.3 (20.9 - 42.2) | 16.7 (9.0 - 26.6) | 0.018 |  | 22.9 (16.5 - 29.8) |
| Relapse at 2 years after transplantation | 25.8 (16.1 - 36.7) | 23.1 (15.1 - 32.1) | 0.344 |  | 23.2 (16.9 - 30.0) |
| NRM at 2 years after transplantation | 13.4 (7.0 - 21.8) | 36.3 (22.1 - 50.7) | 0.004 |  | 23.9 (17.5 - 30.9) |
| RFS at 2 years after transplantation | 63.9 (51.1 - 73.0) | 40.9 (25.7 - 55.5) | 0.002 |  | 51.7 (43.0 - 59.6) |
| OS at 2 years after transplantation | 67.3 (55.1 -76.8) | 46.9 (31.8 -60.6) | 0.004 |  | 58.5 (50.2 -66.1) |

CI, conﬁdence interval; GVHD, graft-versus-host disease; HID, HLA-haploidentical related donor; MSD, HLA-matched sibling donor; NRM, non-relapse mortality; OS, overall survival; RFS, relapse-free survival.

Supplementary Table 2 Clinical manifestations of patients with EBV PTLD

| No. of patient | Type of donor | Initial presentation | Pathology | EBV DNAemia | Diagnosis | Treatment | Outcome  (days post-onset of PTLD) | Cause of death |
| --- | --- | --- | --- | --- | --- | --- | --- | --- |
| 1 | MSD | Fever, supraclavicular and retropharyngeal LN enlargement |  | Yes | Probable | RTX | Survival |  |
| 2 | MSD | Fever, cervical LN enlargement | Infectious mononucleosis-like, EBER+ | Yes | Proven | RTX | Survival |  |
| 3 | HID | Fever, cervical LN enlargement | Polymorphic B-cell, EBER+ | Yes | Proven | RTX | Died on 79th day | Relapse, pneumonia |
| 4 | HID | Fever, cervical LN enlargement |  | Yes | Probable | RTX | Died on 112th day | Sever chronic GVHD, pneumonia |
| 5 | HID | Fever, cervical, supraclavicular, axillary and inguinal LN enlargement |  | Yes | Probable | RTX | Died on 121th day | Relapse |
| 6 | HID | Fever, inguinal LN enlargement |  | Yes | Probable | RTX, EBV-CTL | Died on 123th day | Relapse |
| 7 | HID | Fever, cervical LN enlargement |  | Yes | Probable | RTX | Died on 11th day | Relapse, PTLD, pneumonia |
| 8 | HID | Fever, submandibular LN enlargement |  | Yes | Probable | RTX | Died on 45th day | CMV pneumonia |
| 9 | HID | Fever, cervical LN enlargement, GI bleeding |  | Yes | Probable | RTX | Died on 99th day | Relapse |
| 10 | HID | Fever, cervical LN enlargement, dyspnea |  | Yes | Probable | RTX | Died on 51th day | Secondary graft dysfunction |
| 11 | HID | Fever, tonsil, retropharyngeal and cervical LN enlargement | Reactive plasmacytic hyperplasia, EBER+ | Yes | Proven | RTX, EBV-CTL | Died on 93th day | PTLD, secondary graft dysfunction, GI bleeding |
| 12 | HID | Fever, cervical, supraclavicular, axillary and inguinal LN enlargement |  | Yes | Probable | RTX | Died on 5th day | PTLD, CMV pneumonia |
| 13 | HID | Fever, tonsil, cervical LN enlargement |  | Yes | Probable | RTX, DLI | Survival |  |
| 14 | HID | Fever, cervical LN enlargement |  | Yes | Probable | RTX | Survival |  |
| 15 | HID | Fever, cervical LN enlargement, CSF EBV DNA+ |  | Yes | Probable | RTX | Survival |  |
| 16 | HID | Fever, cervical and submandibular LN enlargement |  | Yes | Probable | RTX | Survival |  |
| 17 | HID | Fever, cervical LN enlargement |  | Yes | Probable | RTX | Survival |  |
| 18 | HID | Fever, cervical LN enlargement | Polymorphic B-cell, EBER+ | Yes | Proven | RTX | Died on 355th day | Fungal pneumonia |
| 19 | HID | Fever, cervical, supraclavicular, axillary and inguinal LN enlargement |  | Yes | Probable | RTX | Survival |  |

CMV, cytomegalovirus; CNS, central nervous system; CSF, cerebrospinal fluid; DLI, donor lymphocyte infusion; EBER, in situ hybridization for EBV-encoded RNA transcripts; EBV-CTL, use of EBV-specific cytotoxic lymphocyte; GI tract, gastrointestinal tract; GVHD, graft-versus-host disease; HID, HLA-haploidentical related donor; LN, lymph nodes; MSD, HLA-matched sibling donor; RTX, administration of Rituximab

Supplementary Table 3 Multivariate analysis for risk factors of transplant outcomes in total cohort

| Variable | RFS | |  | OS | |  | Relapse | |  | NRM | |
| --- | --- | --- | --- | --- | --- | --- | --- | --- | --- | --- | --- |
| HR (95% CI) | *p* value | HR (95% CI) | *p* value | HR (95% CI) | *p* value | HR (95% CI) | *p* value |
| Age |  | 0.985 |  |  | 0.341 |  |  | 0.290 |  |  | 0.310 |
| < 40-yr | 1 |  |  | 1 |  |  | 1 |  |  | 1 |  |
| ≥ 40-yr | 1.0 (0.6–1.6) |  |  | 1.3 (0.7–2.1) |  |  | 0.7 (0.4–1.4) |  |  | 1.4 (0.7–2.7) |  |
| Gender |  | 0.517 |  |  | 0.317 |  |  | 0.320 |  |  | 0.750 |
| Male | 1 |  |  | 1 |  |  | 1 |  |  | 1 |  |
| Female | 0.9 (0.5–1.4) |  |  | 0.8 (0.4–1.3) |  |  | 0.7 (0.4–1.4) |  |  | 1.1 (0.6–2.3) |  |
| Disease |  | 0.034 |  |  | 0.030 |  |  | 0.470 |  |  | 0.170 |
| Myeloid malignancies | 1 |  |  | 1 |  |  | 1 |  |  | 1 |  |
| Lymphoid malignancies | 1.7 (1.0–2.9) |  |  | 1.8 (1.1–3.2) |  |  | 1.3 (0.6–3.0) |  |  | 1.6 (0.8–3.1) |  |
| Disease status at PBSCT |  | 0.018 |  |  | 0.077 |  |  | 0.067 |  |  | 0.630 |
| Complete remission | 1 |  |  | 1 |  |  | 1 |  |  | 1 |  |
| Non-remission | 1.9 (1.1–3.3) |  |  | 1.7 (0.9–3.0) |  |  | 2.2 (0.9–5.1) |  |  | 1.2 (0.5–2.7) |  |
| Pretreatment with ATG |  | 0.283 |  |  | 0.365 |  |  | 0.074 |  |  | 0.560 |
| No ATG | 1 |  |  | 1 |  |  | 1 |  |  | 1 |  |
| ATG | 0.6 (0.2–1.5) |  |  | 0.6 (0.2–1.7) |  |  | 0.3 (0.1–1.1) |  |  | 1.5 (0.4–6.1) |  |
| Conditioning regimen |  | 0.006 |  |  | 0.006 |  |  | 0.063 |  |  | 0.750 |
| Non-fludarabine | 1 |  |  | 1 |  |  | 1 |  |  | 1 |  |
| Fludarabine-containing | 2.5 (1.3–4.7) |  |  | 2.5 (1.3–4.9) |  |  | 2.3 (1.0–5.6) |  |  | 1.2 (0.4–3.7) |  |
| Donor’s type |  | 0.007 |  |  | 0.009 |  |  | 0.026 |  |  | 0.570 |
| Matched sibling donors | 1 |  |  | 1 |  |  | 1 |  |  | 1 |  |
| Haploidentical donors | 3.6 (1.4–9.1) |  |  | 3.8 (1.4–10.5) |  |  | 4.2 (1.2–14.7) |  |  | 1.5 (0.4–6.2) |  |
| Donor’s gender |  | 0.050 |  |  | 0.032 |  |  | 0.570 |  |  | 0.100 |
| Male | 1 |  |  | 1 |  |  | 1 |  |  | 1 |  |
| Female | 0.6 (0.4–1.0) |  |  | 0.5 (0.3–0.9) |  |  | 0.8 (0.4–1.7) |  |  | 0.5 (0.3–1.1) |  |
| Donor’s age |  | 0.655 |  |  | 0.756 |  |  | 0.460 |  |  | 0.860 |
| < 40-yr | 1 |  |  | 1 |  |  | 1 |  |  | 1 |  |
| ≥ 40-yr | 1.1 (0.7–1.8) |  |  | 1.1 (0.6–1.8) |  |  | 1.3 (0.6–2.8) |  |  | 0.9 (0.5–1.9) |  |
| Donor-recipient ABO match |  | 0.713 |  |  | 0.845 |  |  | 0.220 |  |  | 0.650 |
| Match | 1 |  |  | 1 |  |  | 1 |  |  | 1 |  |
| Mismatch | 1.1 (0.7–1.8) |  |  | 1.1 (0.6–1.7) |  |  | 1.5 (0.8–3.1) |  |  | 0.9 (0.4–1.7) |  |
| CMV DNAemia |  | 0.744 |  |  | 0.857 |  |  | 0.690 |  |  | 0.580 |
| No | 1 |  |  | 1 |  |  | 1 |  |  | 1 |  |
| Yes | 1.1 (0.6–2.1) |  |  | 0.9 (0.5–1.9) |  |  | 1.2 (0.5–3.0) |  |  | 1.3 (0.5–3.2) |  |
| EBV DNAemia |  | 0.239 |  |  | 0.208 |  |  | 0.025 |  |  | 0.450 |
| No | 1 |  |  | 1 |  |  | 1 |  |  | 1 |  |
| Yes | 0.7 (0.3–1.3) |  |  | 0.6 (0.3–1.3) |  |  | 0.3 (0.1–0.9) |  |  | 1.4 (0.6–3.6) |  |
| PTLD |  | 0.221 |  |  | 0.101 |  |  | 0.092 |  |  | 0.650 |
| No | 1 |  |  | 1 |  |  | 1 |  |  | 1 |  |
| Yes | 1.6 (0.7–3.5) |  |  | 1.9 (0.9–4.2) |  |  | 3.0 (0.8–10.9) |  |  | 0.8 (0.2–2.4) |  |
| Acute GVHD, grade 2-4 |  | 0.005 |  |  | 0.001 |  |  | 0.920 |  |  | 0.010 |
| No | 1 |  |  | 1 |  |  | 1 |  |  | 1 |  |
| Yes | 2.1 (1.3–3.5) |  |  | 2.4 (1.4–4.1) |  |  | 1.0 (0.4–2.1) |  |  | 2.7 (1.3–5.6) |  |
| Chronic GVHD |  | 0.351 |  |  | 0.330 |  |  | 0.190 |  |  | 0.310 |
| No | 1 |  |  | 1 |  |  | 1 |  |  | 1 |  |
| Yes | 0.8 (0.4–1.3) |  |  | 0.7 (0.4–1.4) |  |  | 0.6 (0.2–1.3) |  |  | 1.5 (0.7–3.0) |  |

CI, confidence interval; GVHD, graft-versus-host disease; PBSCT, peripheral blood stem cell transplantation.


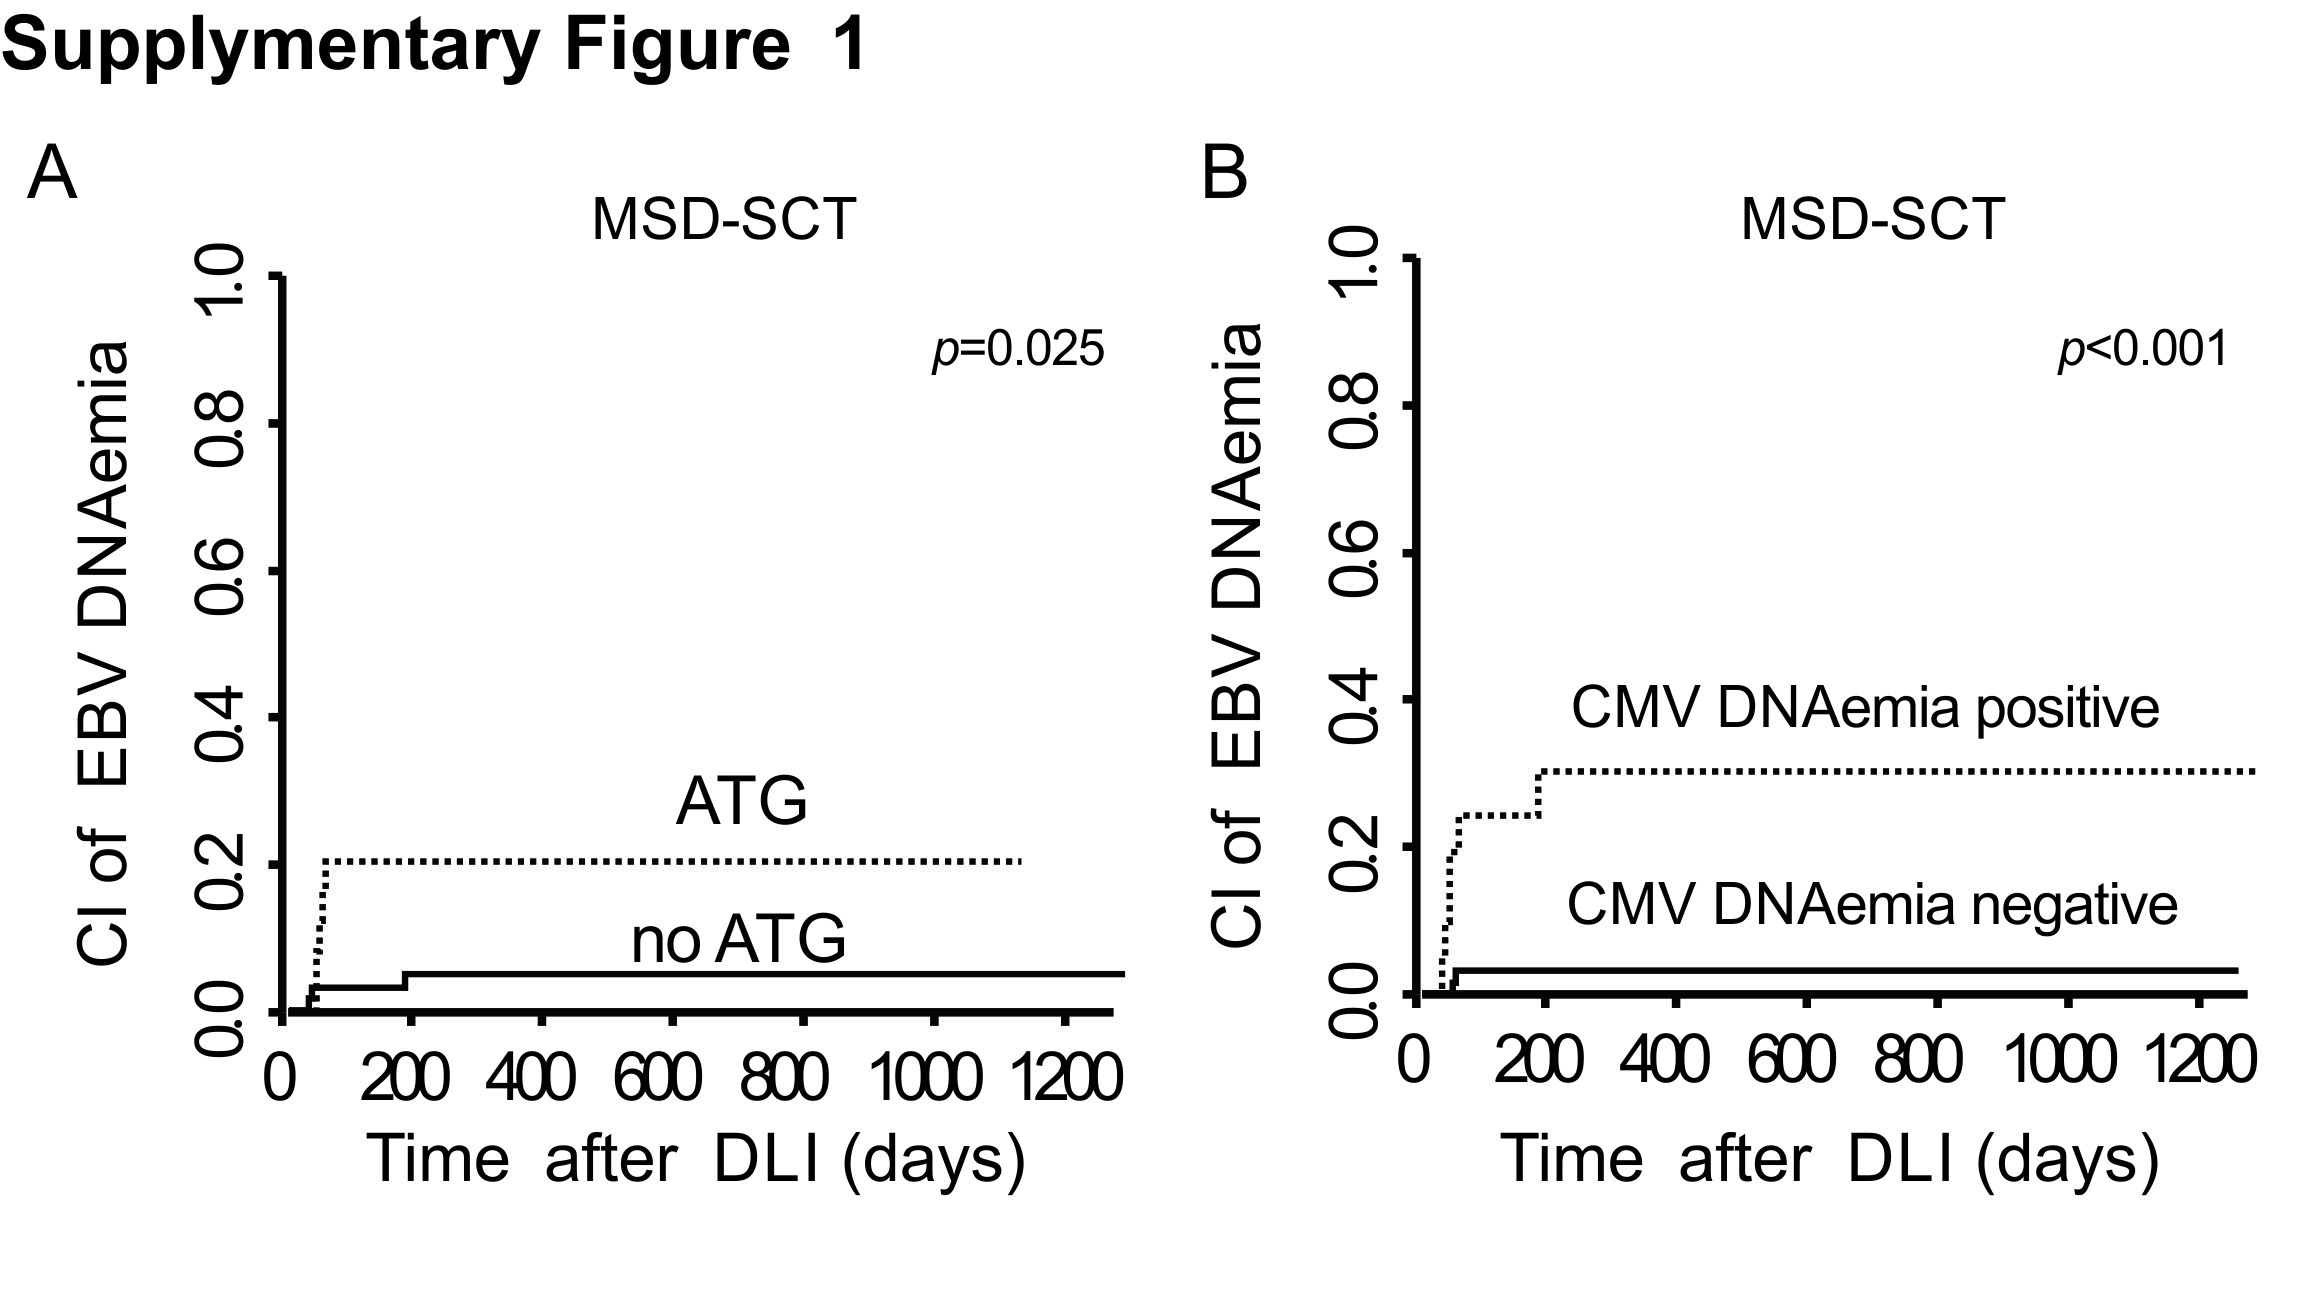


Supplementary Figure 1. Comparisons of cumulative incidences of EBV DNAemia according to risk factors in MSD-SCT recipients.


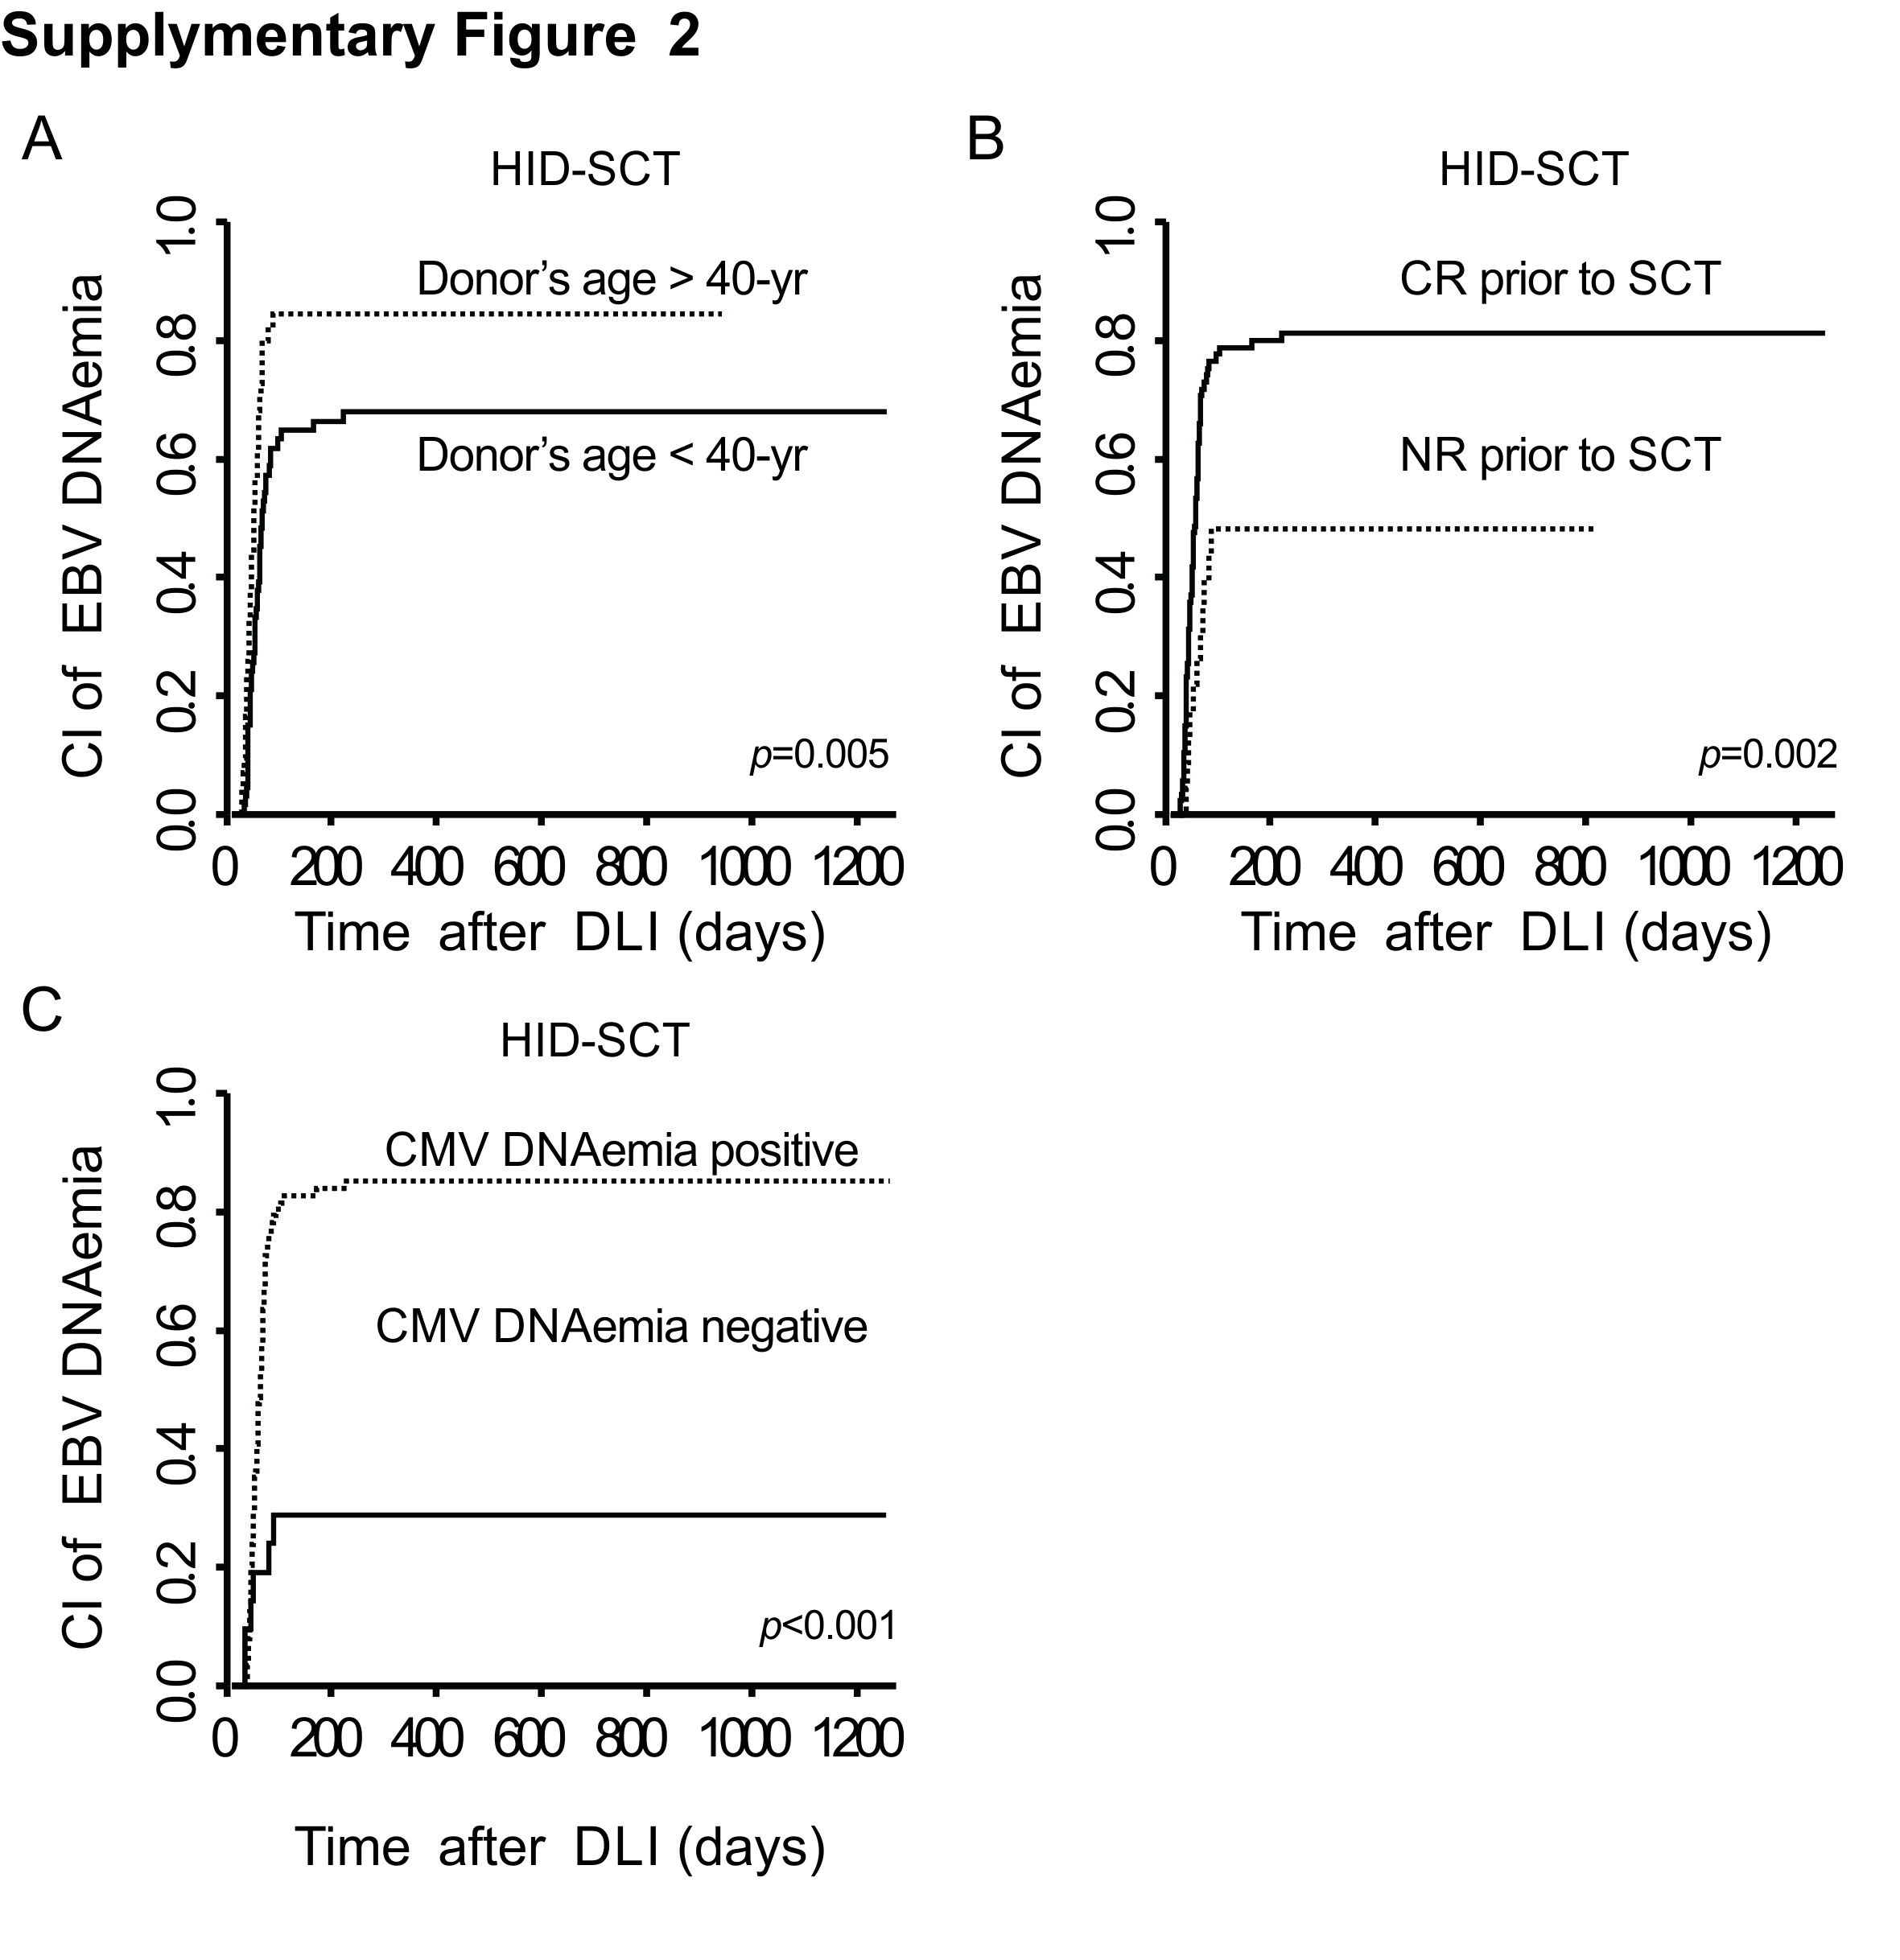


Supplementary Figure 2. Comparisons of cumulative incidences of EBV DNAemia according to risk factors in HID-SCT recipients.


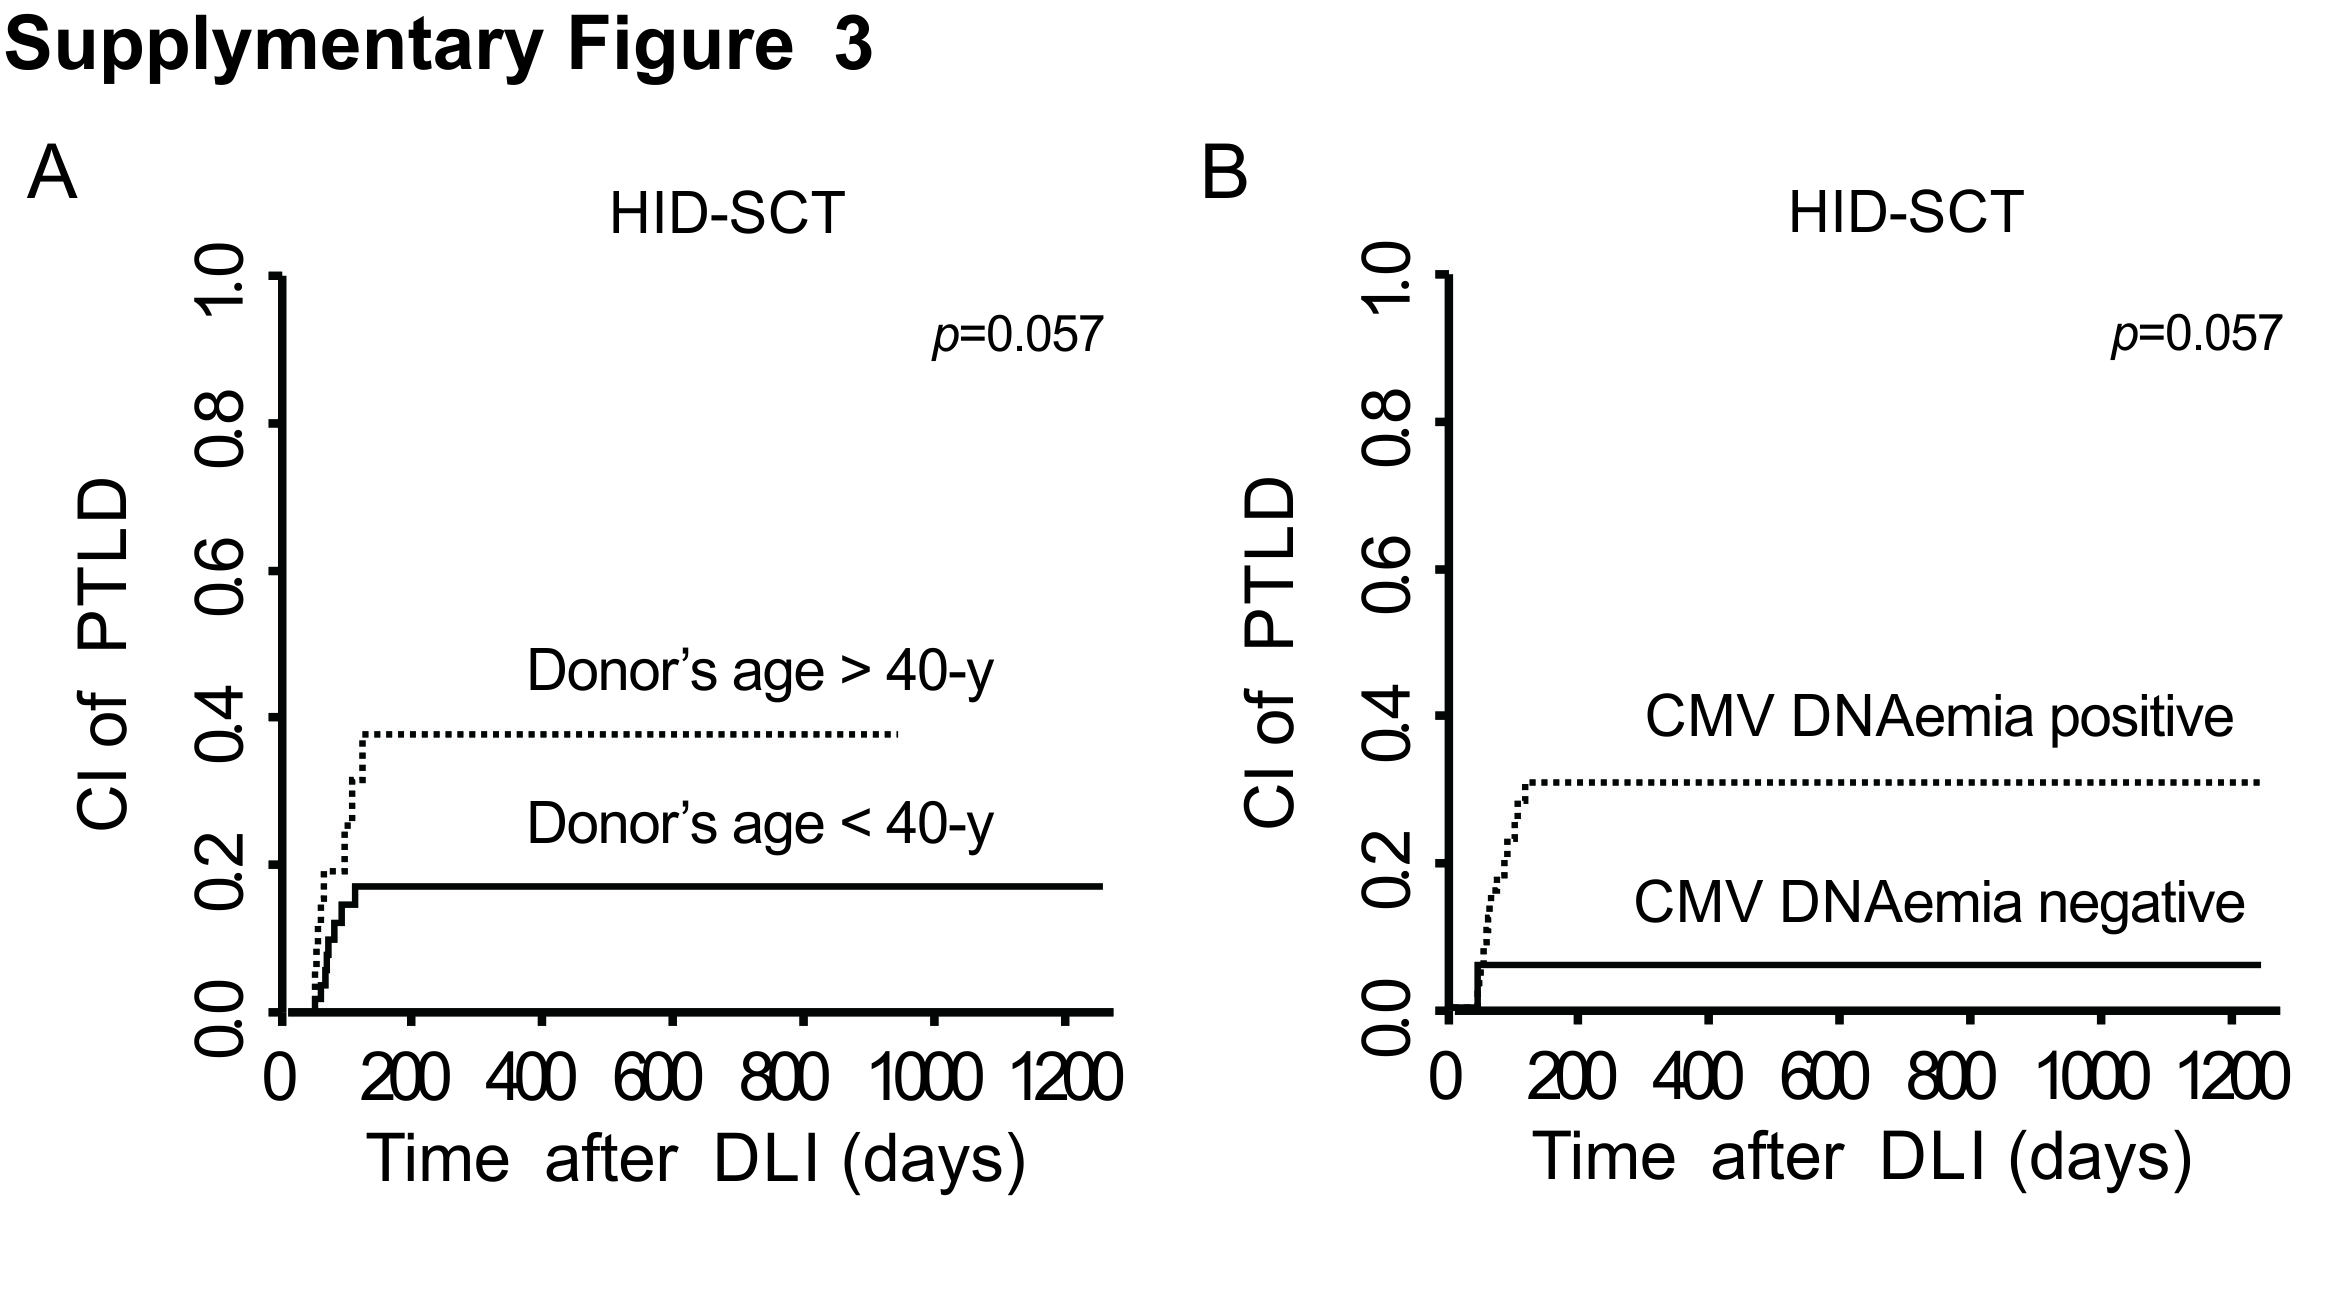


Supplementary Figure 3. Comparisons of cumulative incidences of EBV PTLD according to risk factors in HID-SCT recipients.


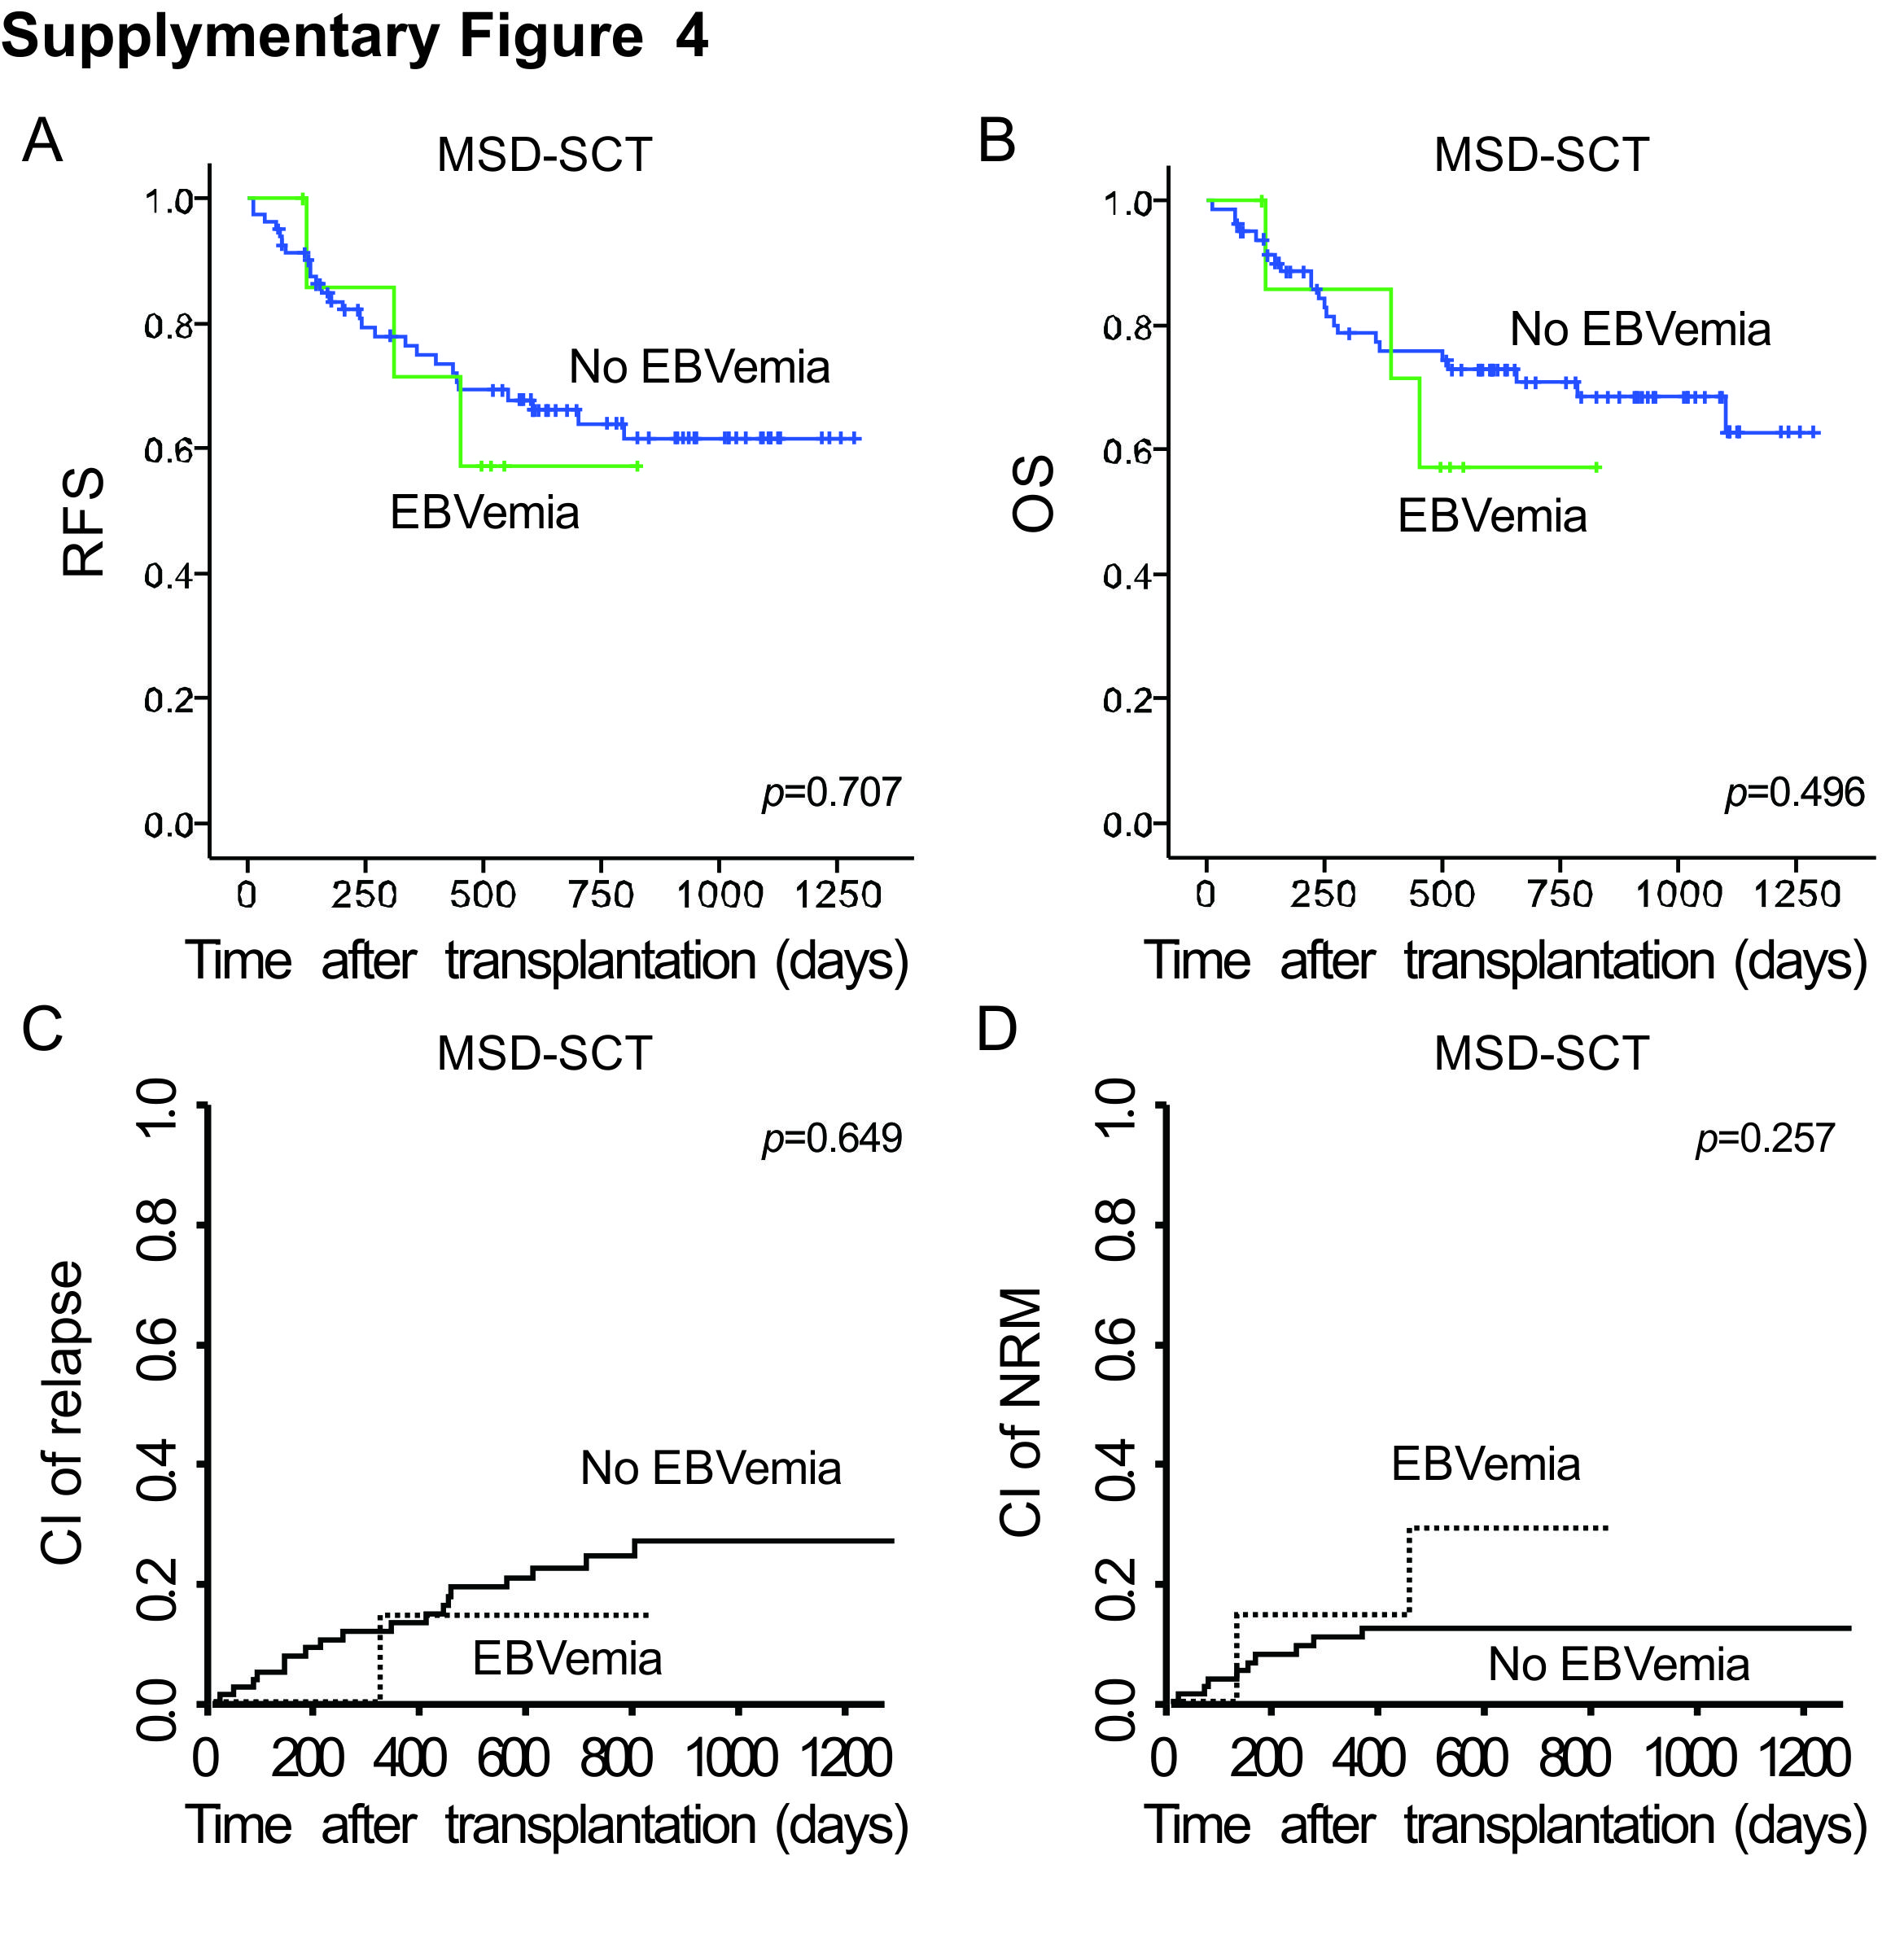


Supplementary Figure 4. Comparisons of transplant outcomes of MSD-SCT recipients according to EBV serostatus.


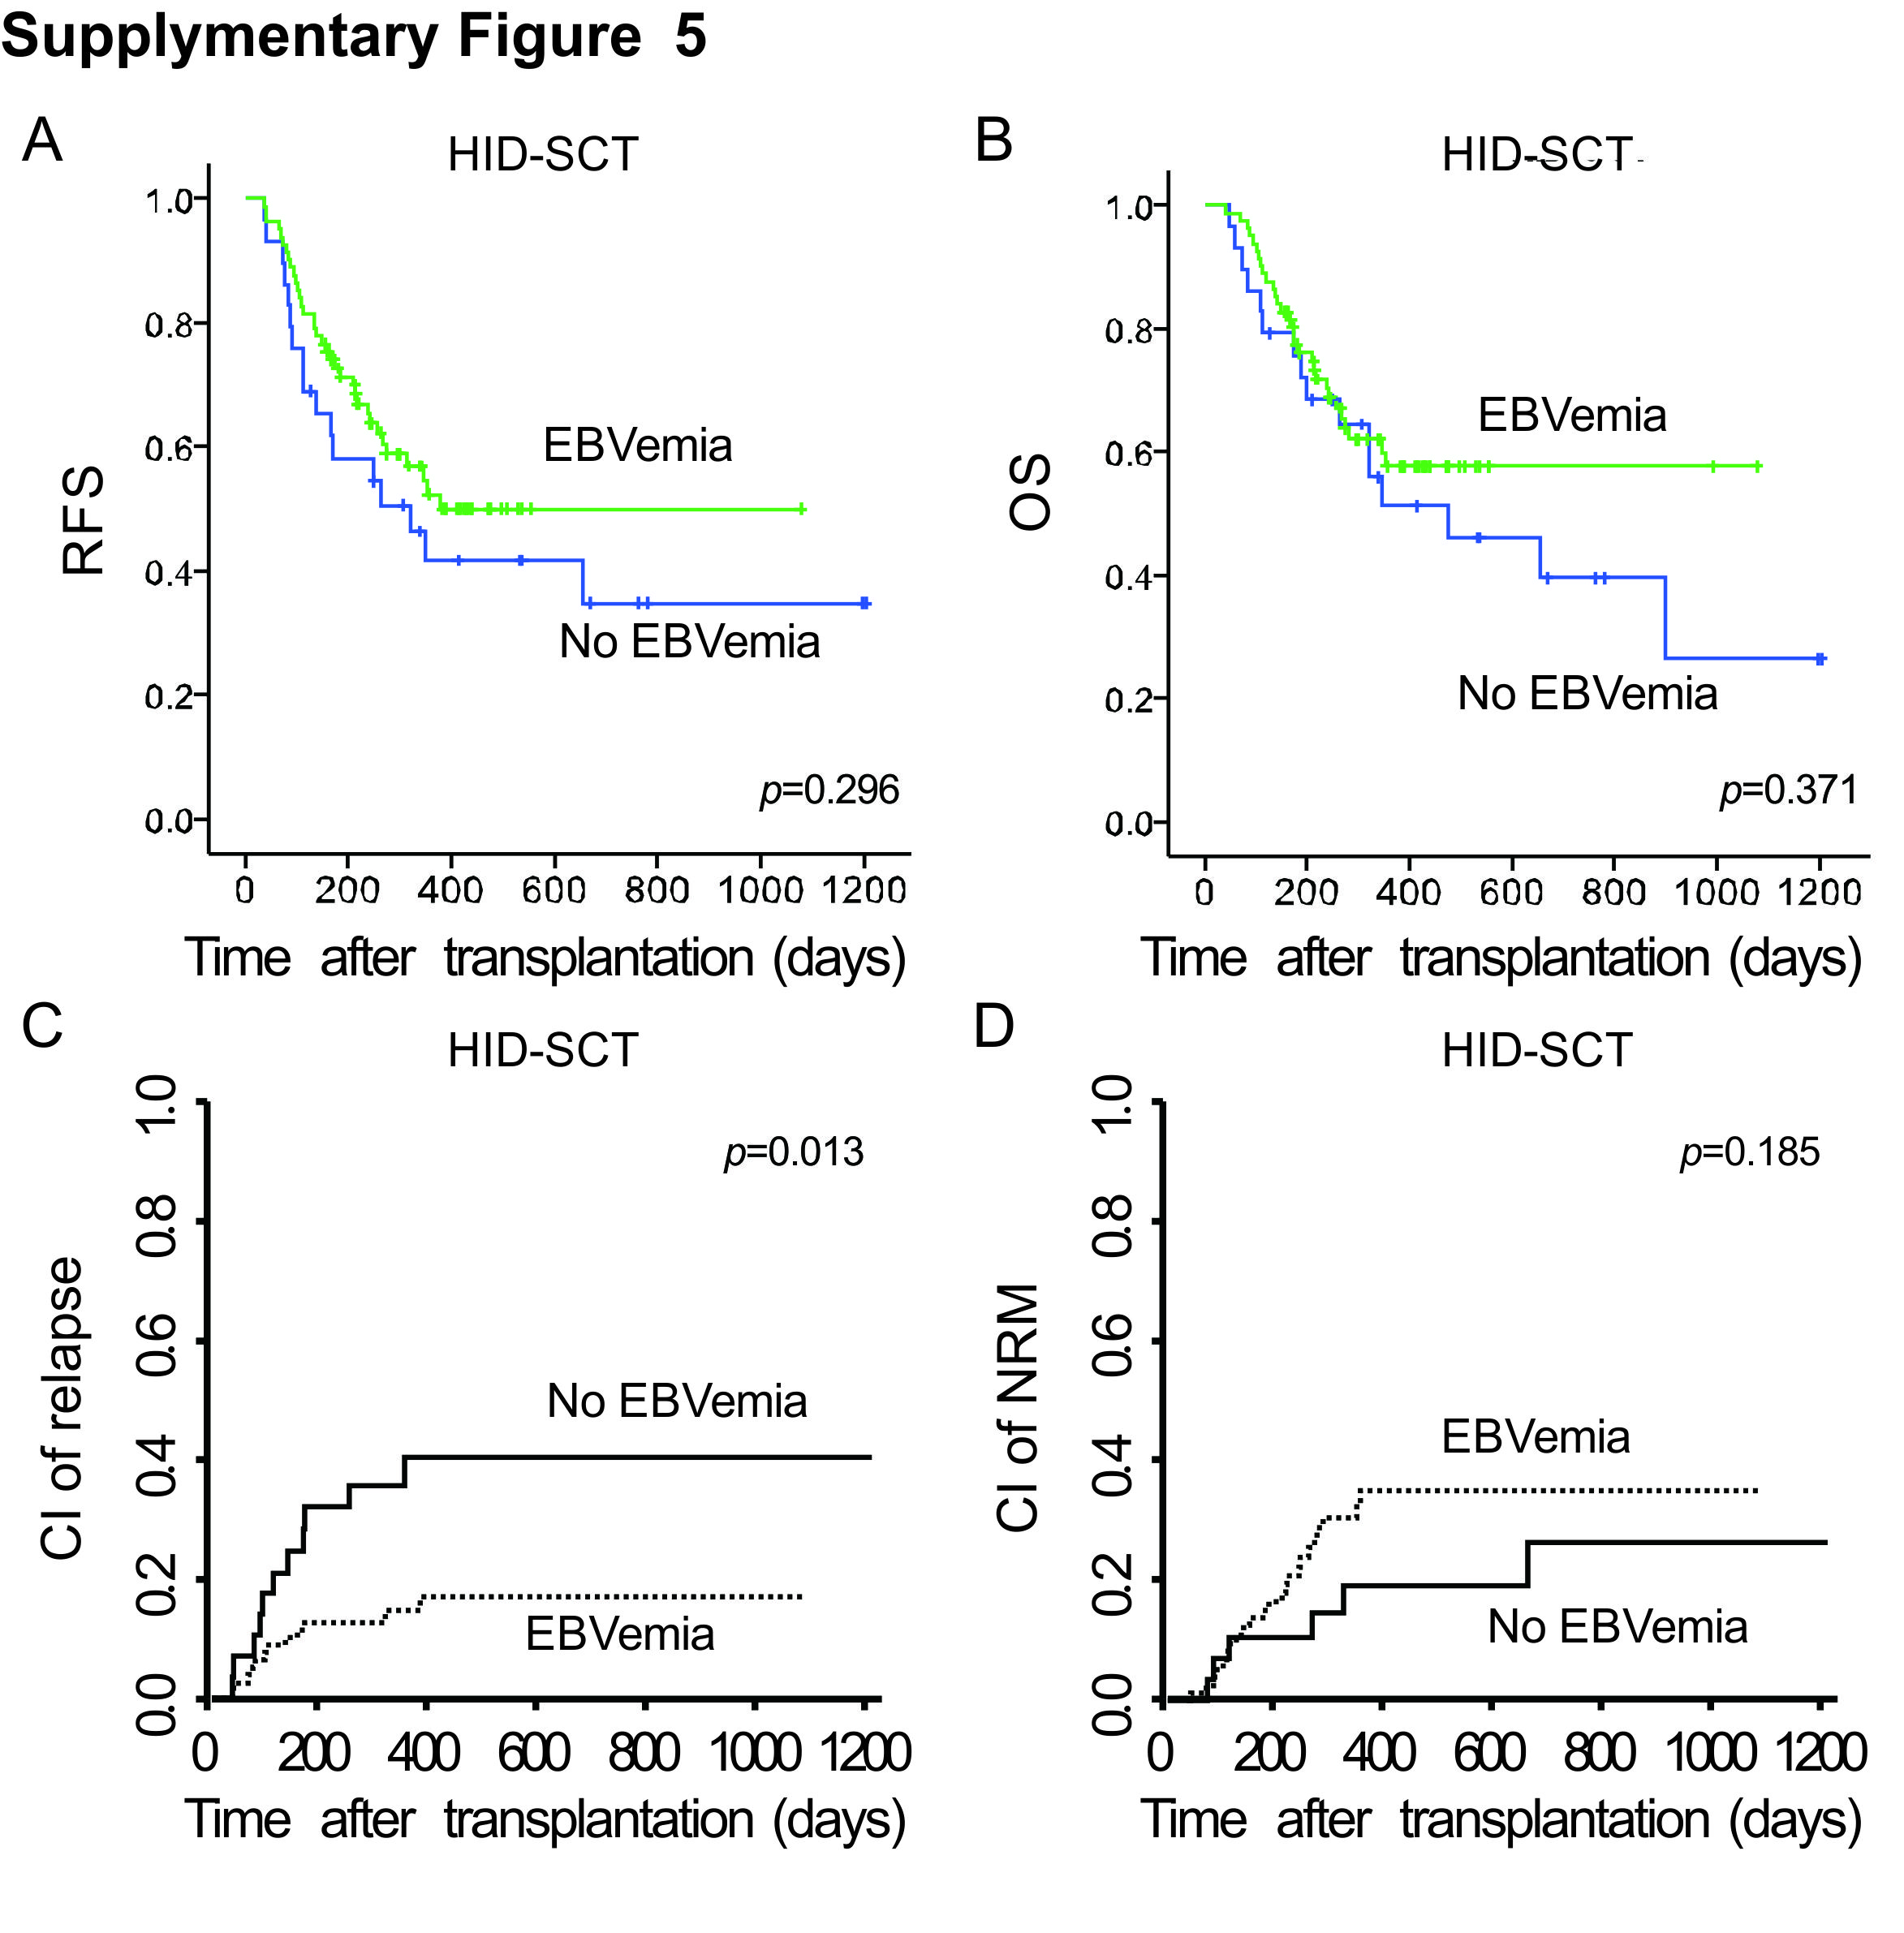


Supplementary Figure 5. Comparisons of transplant outcomes of HID-SCT recipients according to EBV serostatus.


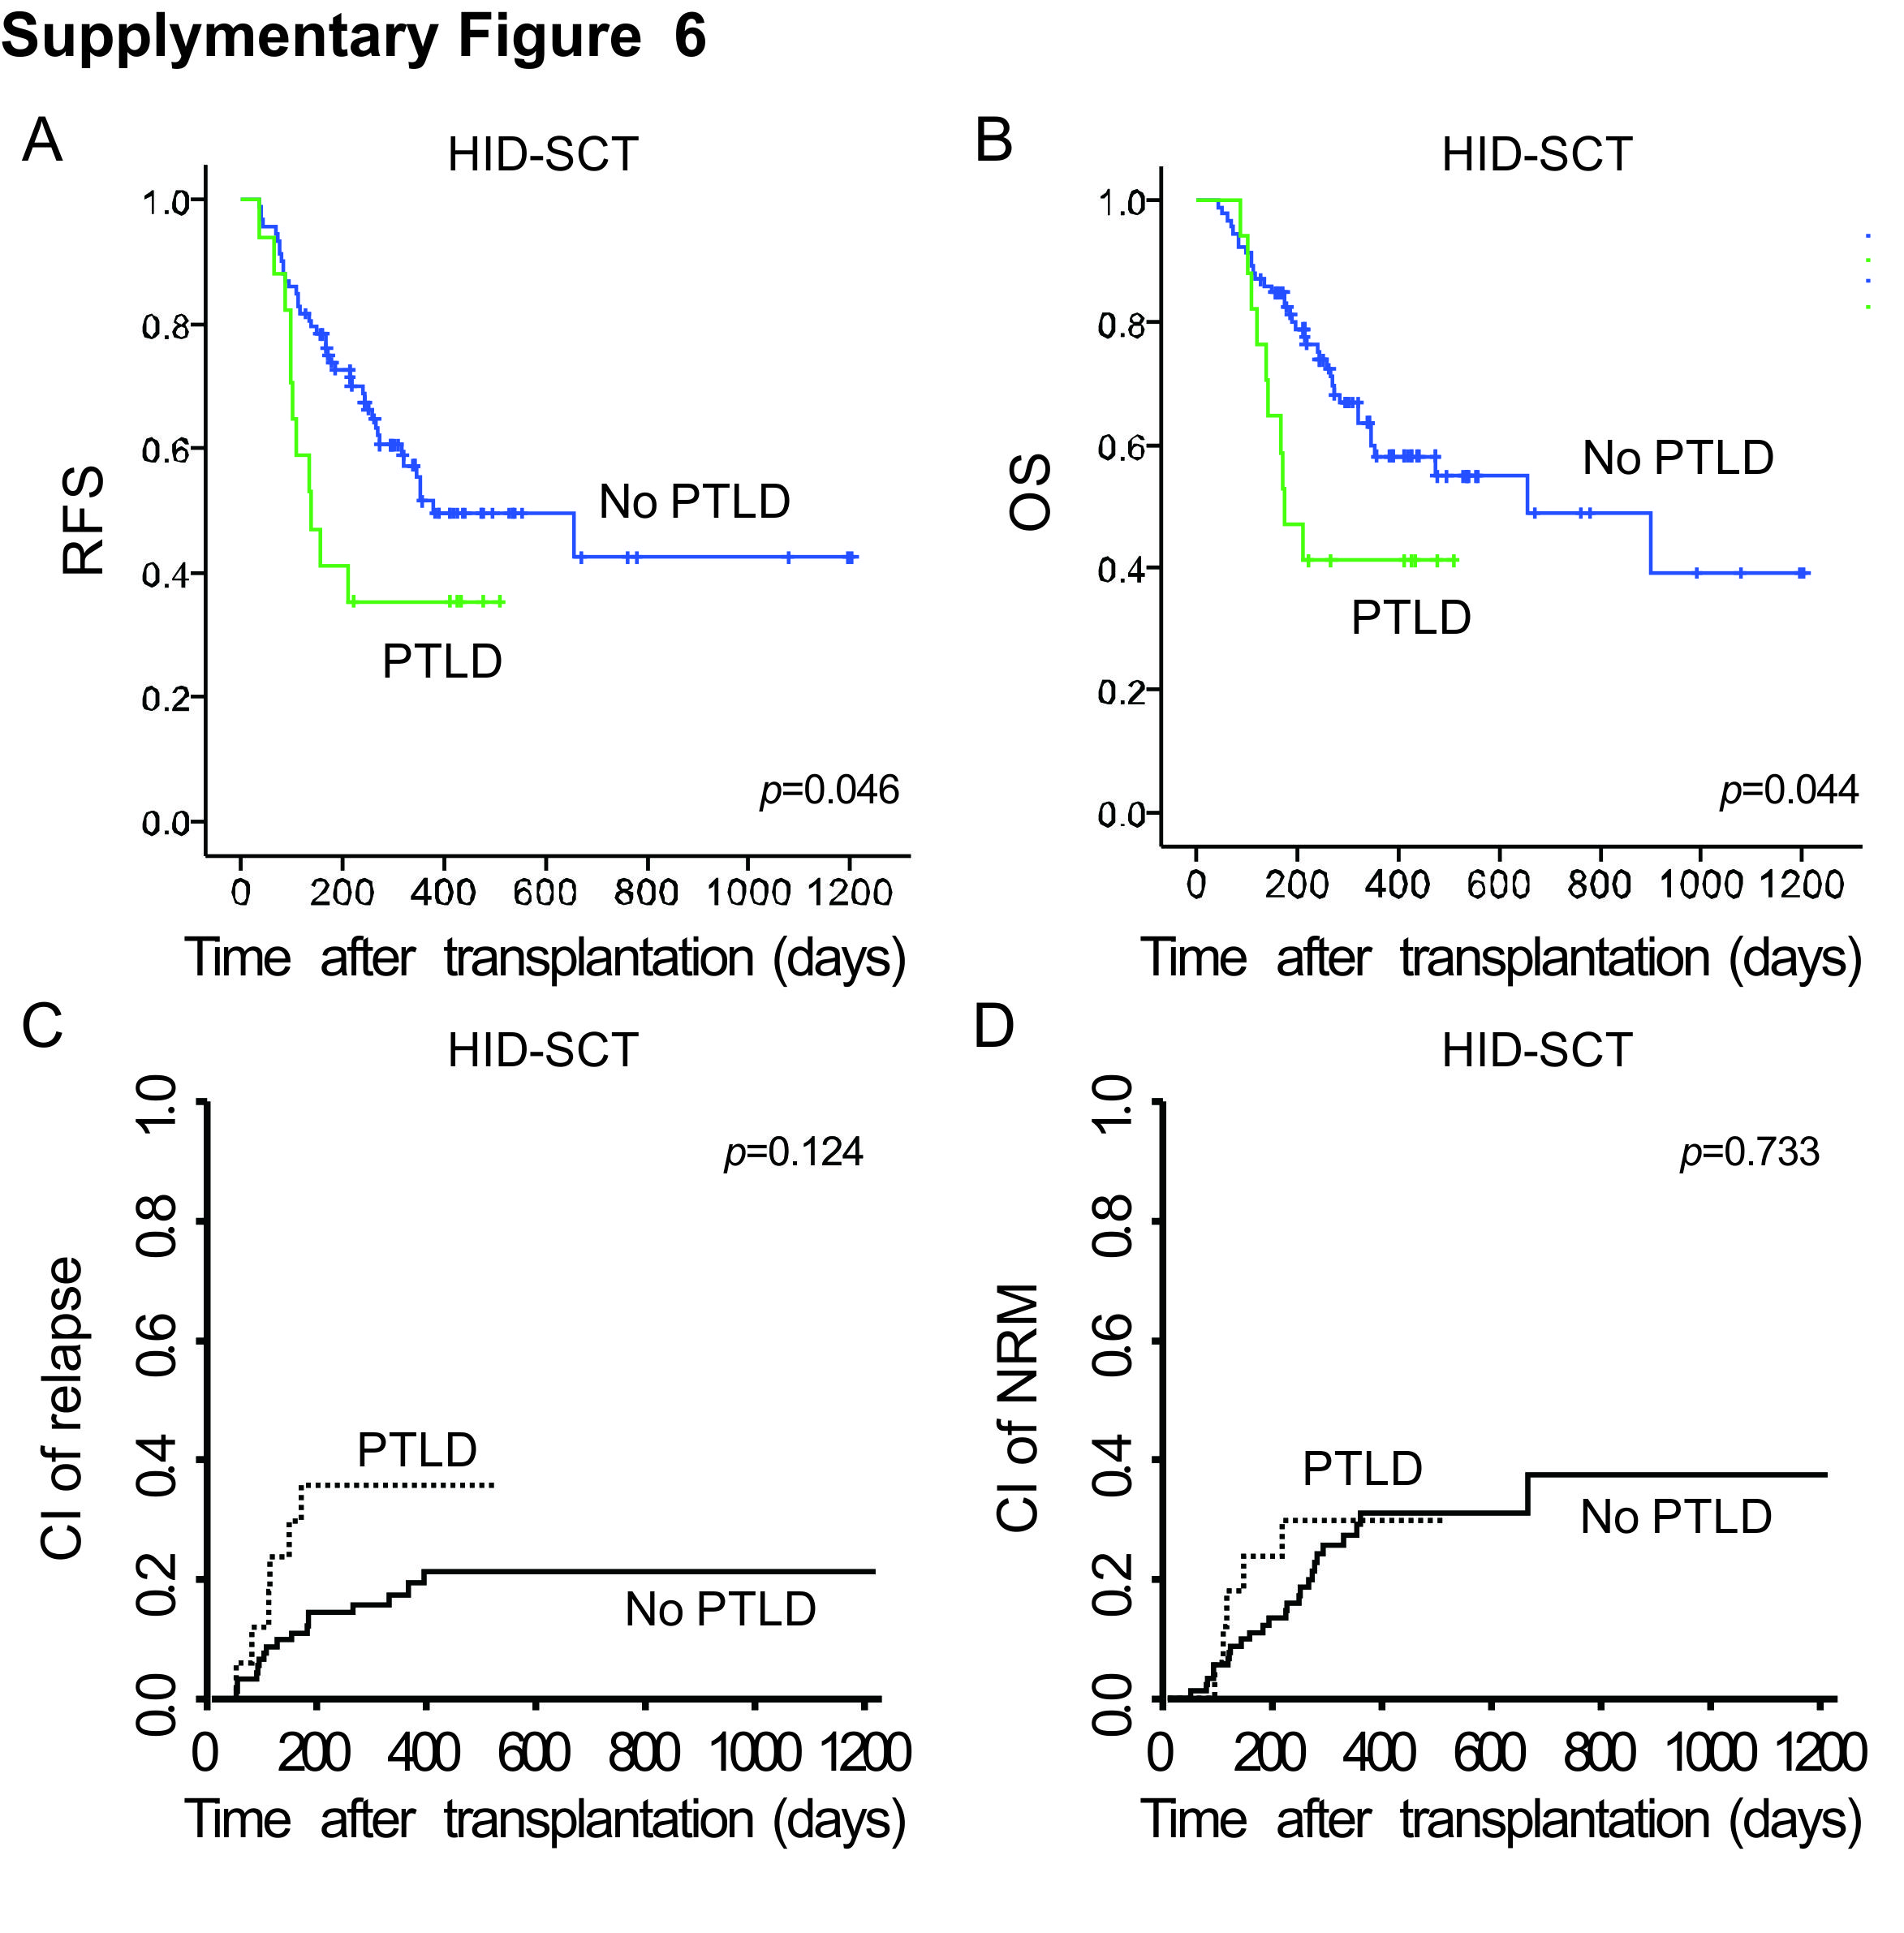


Supplementary Figure 6. Comparisons of transplant outcomes of HID-SCT recipients according to the occurrence of EBV PTLD.
